# Supplementary material for: Protective Effect of Argan and Olive Oils against LPS-Induced Oxidative Stress and Inflammation in Mice Livers
Source: PubMed Central journal article supplement (PMC5666862; doi:10.3390/ijms18102181), 2017-10-19
Supplement: ijms-18-02181-s001.pdf [file ijms-18-02181-s001.pdf]

**Supplementary Table 1.** Primers sequences used for the quantitative real-time PCR experiment.

| Gene name                        | Primers                        |
|----------------------------------|--------------------------------|
| - 36B4 <i>forward</i> :          | 5'-ATCTGCTTGGAGCCCACAT-3'      |
| - 36B4 <i>reverse</i> :          | 5'-GCGACCTGGAAGTCCAATA-3'      |
| - IL-6 <i>forward</i> :          | 5'-TCTATACCACTTCACAAGTCGGA-3'  |
| - IL-6 <i>reverse</i> :          | 5'-GAATTGCCATTGCACAACCTCTTT-3' |
| - IL-4 <i>forward</i> :          | 5'-CCATATCCACGGATGCGACAA-3'    |
| - IL-4 <i>reverse</i> :          | 5'-CCTCGTTCAAATGCCGATGAT-3'    |
| - IL-10 <i>forward</i> :         | 5'-GCTGGACAACATACTGCTAACC-3'   |
| - IL-10 <i>reverse</i> :         | 5'-CCCAAGTAACCCTTAAAGTCCTG-3'  |
| - TNF- $\alpha$ <i>forward</i> : | 5'-CCCTCACACTCAGATCATCTTCT-3'  |
| - TNF- $\alpha$ <i>reverse</i> : | 5'-GCTACGACGTGGGCTACAG-3'      |
